# Supplementary material for: Gastrointestinal Symptoms Are Associated with Increased Risk of Progression from Non- severe to Severe Illness in COVID-19 Patients
Source: Research Square preprint supplement (doi:10.21203/rs.3.rs-1572695/v1), 2022-05-20
Supplement: Supplementary file 1 [file c3680c61b1eb9ec9db2bd6c5.docx]

Supplementary table 1. Odds ratios after adjusting age and sex for the severity of illness.

|  | **Occurrence of symptoms, no. (%)** | | **No adjustment** | | **Age- and sex-Adjustment** | |
| --- | --- | --- | --- | --- | --- | --- |
| **Non-severe (840)** | **Severe (94)** | **Odds ratio** | **P** | **Odds ratio** | **P** |
| **GI symptoms, mean (SD)** | 1.61±1.69 (n=840) | 1.99±2.02 (n=94) | 1.12 (>1.00-1.45) | 0.047 | 1.10 (0.98-1.23) | 0.11 |
| **Gastrointestinal hemorrhage in total, n (%)** | 5/840 (0.6) | 4/94 (4.3) | 6.07 (1.00-36.8) | 0.04 | 3.25 (0.52-20.2) | 0.21 |

GI, gastrointestinal; SD, standard deviation;

Supplementary table 2.Laboratory examination and CT findings between patients with or without GI symptoms.

|  | **Without GI symptoms (N=375)** | **With GI symptoms (N=559)** | **P** |
| --- | --- | --- | --- |
| **Laboratory examination** |  |  |  |
| White blood cell count, × 10⁹ per L (3.5-9.5× 10⁹ per L) | 6.15±2.30 (n=342) | 6.42±4.72 (n=531) | 0.32 |
| >10× 10⁹ per L, n (%) | 18/342 (5.3) | 32/531 (6.0) | 0.64 |
| <4× 10⁹ per L, n (%) | 38/342 (11.1) | 48/531 (9.0) | 0.32 |
| Neutrophil granulocyte, × 10⁹ per L (1.8-6.3× 10⁹ per L) | 3.612.37 (n=342) | 3.99±3.29 (n=541) | 0.22 |
| >6.3× 10⁹ per L, n (%) | 33/342 (9.6) | 55/531 (10.4) | 0.73 |
| <1.8× 10⁹ per L, n (%) | 15/342 (4.4) | 17/531 (3.2) | 0.36 |
| Neutrophil to lymphocyte ratio | 3.23±6.46 (n=342) | 3.52±4.76 (n=541) | 0.45 |
| Platelet count, × 10⁹ per L (125-350× 10⁹ per L) | 216.8±70.6 (n=342) | 231.5±80.1 (n=541) | **0.01** |
| <100× 10⁹ per L, n (%) | 12/342 (3.5) | 14/531 (2.6) | 0.46 |
| C-reactive protein, mg/L (0-10 mg/L) | 10.3±30.3 (n=323) | 13.4±38.2 (n=499) | 0.41 |
| >10 mg/L, n (%) | 52/323 (16.1) | 103/499 (20.6) | 0.10 |
| LDH, U/L (125-220 U/L) | 52.1±100.0 (n=96) | 71.1±116.6 (n=191) | 0.73 |
| >220 U/L, n (%) | 30/96 (31.3) | 50/191 (26.2) | 0.37 |
| Creatine kinase, U/L (<167 U/L) | 18.6±50.2 (n=103) | 21.2±39.8 (n=193) | 0.37 |
| >167 U/L, n (%) | 2/103 (1.9) | 3/194 (1.5) | >0.99 |
| Procalcitonin, ng/ml (0-0.05 ng/mL) | 0.05±0.25 (n=231) | 0.11±0.85 (n=364) | 0.26 |
| ≤0.05 ng/mL, n (%) | 152/231 (65.8) | 243/364 (66.8) | 0.81 |
| 0.05-0.1 ng/mL, n (%) | 40/231 (17.3) | 61/364 (16.8) |
| 0.1-0.25 ng/mL, n (%) | 28/231 (12.1) | 40/364 (11.0) |
| 0.25-0.5 ng/mL, n (%) | 5/231 (2.2) | 7/364 (1.9) |
| >0.5 ng/mL, n (%) | 6/231 (2.6) | 13/364 (3.6) |
| IL-6, pg/mL (0-10 pg/ml) | 24.0±212.8 (n=206) | 23.4±173.2 (n=313) | 0.97 |
| >10 pg/mL, n (%) | 24/206 (11.7) | 57/313 (18.2) | **0.04** |
| Lactic acid, mmol/L (<1.3 mmol/L) | 2.52±2.10 (n=56) | 2.50±1.07 (n=87) | 0.93 |
| Hemoglobin, g/L (115-150 g/L-woman; 130-175 g/L -man) | 128.0±18.3 (n=342) | 125.8±16.8 (n=531) | 0.06 |
| Anemia, n (%) | 116/342 (33.9) | 215/531 (40.5) | >0.05 |
| Lymphocyte count, × 10⁹ per L (1.1-3.2 × 10⁹ per L) | 1.70±1.47 (n=342) | 1.57±0.64 (n=531) | 0.08 |
| <0.8× 10⁹ per L, n (%) | 17/342 (5.0) | 52/531 (9.8) | **0.01** |
| >3.5× 10⁹ per L, n (%) | 4/342 (1.2) | 5/531 (0.9) | >0.99 |
| Hematocrit (35-45) | 37.78±5.12(n=342) | 37.12±4.76 (n=531) | >0.05 |
| Prothrombin time, s (9.2-15 s) | 11.7±1.57 (n=265) | 11.8±1.35 (n=423) | 0.84 |
| >15 s, n (%) | 5/265 (1.9) | 12/423 (2.8) | 0.44 |
| D-dimer, mg/L (0-0.55 mg/L) | 1.38±6.81 (n=255) | 1.75±6.87 (n=404) | 0.49 |
| ≤0.55 mg/L, n (%) | 166/255 (65.1) | 246/404 (60.9) | 0.28 |
| 0.55-1 mg/L, n (%) | 38/255 (14.9) | 61/404 (15.1) |
| >1 mg/L, n (%) | 50/255 (19.6) | 97/404 (24.0) |
| International normalized ratio, (0.8-1.25) | 1.08±0.15 (n=265) | 1.07±0.12 (n=423) | 0.36 |
| APTT, s (21-37 s) | 32.6±5.12 (n=264) | 32.0±5.79 (n=423) | 0.20 |
| Glucose, mmol/L (3.9-6.1 mmol/L) | 5.66±2.90 (n=295) | 5.53±2.49 (n=477) | 0.50 |
| Albumin, g/L (35-52 g/L) | 38.2±4.40 (n=331) | 37.2±4.89 (n=519) | **0.001** |
| Hypoalbuminemia (< 32 g/L), n (%) | 37/331 (11.2) | 73/519 (14.1) | 0.22 |
| Globulin, g/L (64-83 g/L) | 32.2±4.96 (n=324) | 32.5±6.12 (n=510) | 0.51 |
| Abnormal liver function, n (%) | 50/330 (15.2) | 77/519 (14.8) | 0.90 |
| Total bilirubin, μmol/L (3.4-20.5 μmol/L) | 10.9±5.95 (n=330) | 10.6±6.25 (n=518) | 0.60 |
| Total bilirubin↑, n (%) | 13/330 (3.9) | 28/518 (5.4) | 0.34 |
| ALT, U/L (0-55 U/L) | 28.1±30.1 (n=331) | 30.4±44.7 (n=518) | 0.41 |
| > 55 U/L, n (%) | 30/331 (9.1) | 50/519 (9.6) | 0.78 |
| AST, U/L (0-40 U/L) | 21.7±26.0 (n=331) | 22.2±22.1 (n=519) | 0.78 |
| > 40 U/L, n (%) | 23/331 (6.9) | 45/519 (8.7) | 0.37 |
| Na+, mmol/L (136-145 mmol/L) | 140.2±3.11 (n=327) | 140.0±3.15 (n=508) | 0.45 |
| K+, mmol/L (3.5-5.1 mmol/L) | 4.16±1.91 (n=326) | 4.12±1.36 (n=502) | 0.69 |
| BUN, mmol/L (2.5-6.7-female; 3.2-7.4-male mmol/L) | 5.05±2.77 (n=325) | 5.38±3.66 (n=512) | 0.16 |
| BUN↑, n (%) | 36/325 (11.1) | 60/512 (11.7) | 0.78 |
| Creatinine, μmol/L (49-90-female; 64-104 μmol/L-male) | 71.3±35.9 (n=324) | 75.2±75.1 (n=512) | 0.38 |
| >133 μmol/L, n (%) | 9/324 (2.8) | 15/512 (2.9) | 0.90 |
| BNP, pg/ml (0-100 pg/ml) | 145.7±484.8 (n=129) | 87.9±292.1(n=223) | 0.16 |
| High-sensitive Troponin I, pg/ml (0-34.2 pg/ml) | 27.6±238.8 (n=217) | 77.0±685.1 (n=307) | 0.31 |
| > 34.2 pg/ml, n (%) | 12/217 (5.5) | 17/307 (5.6) | 0.99 |
| **CT findings** |  |  |  |
| Normal, n (%) | 7/346 (2.0) | 5/535 (0.9) | 0.17 |
| Ground-glass opacity, n (%) | 149/346 (43.1) | 304/535 (56.8) | **<0.001** |
| Bilateral pneumonia, n (%) | 250/346 (72.3) | 430/535 (80.4) | **0.005** |
| Consolidation, n (%) | 17/346 (4.9) | 43/535 (8.3) | 0.07 |

GI, gastrointestinal; LDH, lactate dehydrogenase; APTT, activated partial thromboplastin time; ALT, alanine aminotransferase; AST, aspartate transaminase; BUN, blood urea nitrogen; BNP, brain natriuretic peptide; CT, computed tomography;

Supplementary table 3. Associations between at-admission GI symptoms with general or reparational symptoms.

|  | **Total (n=934)** | **Without GI symptoms (N=375)** | **With GI symptoms (N=559)** | **P** |
| --- | --- | --- | --- | --- |
| **General symptoms** |  |  |  |  |
| Myalgia at admission, n (%) | 244/934 (26.1) | 54/375 (14.4) | 190/559 (34.0) | **<0.001** |
| Myalgia in total, n (%) | 246/934 (26.3) | 55/375 (14.7) | 191/559 (34.2) | **<0.001** |
| Fatigue at admission, n (%) | 442/934 (47.3) | 124/375 (33.1) | 318/559 (56.9) | **<0.001** |
| Fatigue in total, n (%) | 457/934 (48.9) | 130/375 (34.7) | 327/559 (58.5) | **<0.001** |
| Headache at admission, n (%) | 24/934 (2.6) | 9/375 (2.4) | 15/559 (2.7) | 0.79 |
| Headache in total, n (%) | 25/934 (2.7) | 9/375 (2.4) | 16/559 (2.9) | 0.67 |
| Dizziness at admission, n (%) | 40/934 (4.3) | 18/375 (4.8) | 22/559 (3.9) | 0.52 |
| Dizziness in total, n (%) | 52/934 (5.6) | 23/375 (6.1) | 29/559 (5.2) | 0.54 |
| Palpitation at admission, n (%) | 37/934 (4.0) | 12/375 (3.2) | 25/559 (4.5) | 0.33 |
| Palpitation in total, n (%) | 37/934 (4.0) | 12/375 (3.2) | 25/559 (4.5) | 0.33 |
| Disturbance of consciousness at admission, n (%) | 19/934 (2.0) | 7/375 (1.9) | 12/559 (2.1) | 0.77 |
| Disturbance of consciousness in total, n (%) | 19/934 (2.0) | 7/375 (1.9) | 12/559 (2.1) | 0.77 |
| Others, n (%) | 33/934 (3.5) | 13/375 (3.5) | 20/559 (3.6) | 0.93 |
| **Respirational symptoms, mean (SD)** | 2.20±1.32 (n=934) | 1.95±1.30 (n=375) | 2.37±1.30 (n=559) | **<0.001** |
| Any at admission, n (%) | 828/934 (88.7) | 324/375 (86.4) | 504/559 (90.2) | **0.07** |
| Any in total, n (%) | 849/934 (90.9) | 332/375 (88.5) | 517/559 (92.5) | 0.04 |
| Fever, n (%) | 492/930 (52.9) | 180/375 (48.1) | 312/559 (56.1) | **0.02** |
| Cough at admission, n (%) | 605/934 (64.8) | 225/375 (60.0) | 380/559 (68.0) | **0.01** |
| Cough in total, n (%) | 645/934 (69.1) | 243/375 (64.8) | 402/559 (71.9) | 0.02 |
| Sputum production at admission, n (%) | 143/934 (15.3) | 58/375 (15.5) | 85/559 (15.2) | 0.91 |
| Sputum production in total, n (%) | 172/934 (18.4) | 69/375 (18.4) | 103/559 (18.4) | >0.99 |
| Hemoptysis at admission, n (%) | 2/934 (0.2) | 2/375 (0.5) | 0/559 (0) | 0.31 |
| Hemoptysis in total, n (%) | 2/934 (0.2) | 2/375 (0.5) | 0/559 (0) | 0.31 |
| Sore throat at admission, n (%) | 48/934 (5.1) | 21/375 (5.6) | 27/559 (4.8) | 0.60 |
| Sore throat in total, n (%) | 58/934 (6.2) | 24/375 (6.4) | 34/559 (6.1) | 0.84 |
| Dyspnea/Shortness of breath at admission, n (%) | 311/934 (33.3) | 84/375 (22.4) | 227/559 (40.6) | **<0.001** |
| Dyspnea/Shortness of breath in total, n (%) | 351/934 (37.6) | 96/375 (25.6) | 255/559 (45.6) | <0.001 |
| Chest tightness at admission, n (%) | 224/934 (24.0) | 83/375 (22.1) | 141/559 (25.2) | 0.28 |
| Chest tightness in total, n (%) | 316/934 (33.8) | 112/375 (29.9) | 204/559 (36.5) | 0.04 |
| Nasal obstruction at admission, n (%) | 17/934 (1.8) | 4/375 (1.1) | 13/559 (2.3) | 0.16 |
| Nasal obstruction in total, n (%) | 20/934 (2.1) | 5/375 (1.3) | 15/559 (2.7) | 0.16 |

GI, gastrointestinal; SD, standard deviation;

Supplementary table 4. Odds ratios for outcomes between patients with or without non-anorexia at-admission GI symptoms.

|  | **Occurrence of symptoms, no. (%)** | | **No adjustment** | | **Age-, sex- and fever-Adjustment** | | **Full adjustment** | |
| --- | --- | --- | --- | --- | --- | --- | --- | --- |
| **Without GI** | **With GI** | **Odds ratio** | **P** | **Odds ratio** | **P** | **Odds ratio** | **P** |
| **Severity, n (%)** |  |  |  |  |  |  |  |  |
| Severe illness | 79/813 (9.3) | 15/121 (12.4) | 1.32 (0.73-2.37) | 0.36 | 1.32 (0.72-2.43) | 0.38 | 1.24(0.67-2.31) | 0.49 |
| Critical illness | 6/813 (0.7) | 4/121 (3.3) | 4.60 (1.28-16.5) | **0.02** | 4.75 (1.29-17.4) | **0.02** | 5.14 (1.31-20.2) | **0.02** |
| Total severe illness | 92/813 (11.3) | 20/121 (16.5) | 1.56 (0.92-2.63) | 0.10 | 1.61 (0.92-2.82) | 0.10 | 1.54 (0.87-2.72) | 0.14 |
| **Progression, n (%)** |  |  |  |  |  |  |  |  |
| **Non-severe to severe** | 13/336 (1.8) | 5/104 (4.8) | 2.77(0.97-7.94) | 0.06 | 3.41 (1.08-10.8) | **0.04** | 3.43 (1.0-10.9) | **0.04** |
| **Severe to discharge** | 54/77 (70.1) | 8/15 (53.3) | 0.49 (0.16-1.50) | 0.21 | 0.39 (0.12-1.27) | 0.12 | 0.40 (0.12-1.39) | 0.15 |
| **Outcomes and complications, n (%)** |  |  |  |  |  |  |  |  |
| Death | 20/802 (2.5) | 6/119 (5.0) | 2.08 (0.82-5.28) | 0.13 | 2.29 (0.86-6.08) | 0.10 | 2.35 (0.87-6.37) | 0.09 |
| Any complication | 276/813 (33.9) | 43/121 (40.5) | 1.32 (0.90-1.96) | 0.16 | 1.36 (0.89-2.07) | 0.16 | 1.31 (0.86-2.01) | 0.21 |
| ARDS | 7/807 (0.9) | 3/120 (2.5) | 2.93 (0.75-11.5) | 0.12 | 2.95 (0.74-11.7) | 0.12 | 3.73 (0.87-16.0) | 0.08 |
| Shock | 20/807 (2.5) | 5/120 (4.2) | 1.71 (0.63-4.65) | 0.29 | 1.82 (0.66-5.16) | 0.25 | 1.89 (0.66-5.37) | 0.23 |
| Secondary infection | 79/807 (9.8) | 15/120 (12.5) | 1.32 (0.73-2.37) | 0.36 | 1.32 (0.72-2.44) | 0.37 | 1.29 (0.70-2.40) | 0.42 |
| Hypoalbuminemia | 162/741 (21.9) | 35/109 (32.1) | 1.69 (1.09-2.62) | **0.02** | 1.79 (1.11-2.90) | **0.02** | 1.74 (1.07-2.84) | **0.03** |

GI, gastrointestinal; SD, standard deviation; ARDS, acute respiratory distress syndrome;

Supplementary table 5. Baseline characteristics between patients with severe and non-severe to severe illness.

|  | **Total (n=830)** | **Non-severe (N=812)** | **Non-severe to severe (N=18)** | **P** |
| --- | --- | --- | --- | --- |
| **Age (mean ± SD)** | 58.2±14.9 (n=830) | 57.7±14.7 (n=812) | 78.3±8.13 (n=18) | **<0.001** |
| <40, n (%) | 109/830 (13.1) | 109/812 (13.4) | 0/18 (0) | 0.19 |
| 40-60, n (%) | 309/830 (37.2) | 309/812 (38.1) | 0/18 (0) | **0.001** |
| >60, n (%) | 412/830 (49.6) | 394/812 (48.5) | 18/18 (100) | **<0.001** |
| **Gender (male), n (%)** | 353/830 (42.5) | 342/812 (42.1) | 11/18 (61.1) | 0.11 |
| **Exposure history, n (%)** |  |  |  | 0.51 |
| From Wuhan | 748/830 (90.1) | 733/812 (90.3) | 15/18 (83.3) |  |
| Contact with patients | 76/830 (9.2) | 73/812 (9.0) | 3/18 (16.7) |  |
| Clustering outbreak | 6/830 (0.7) | 6/812 (0.7) | 0/18 (0) |  |
| **Smoking, n (%)** | 34/830 (4.1) | 34/812 (4.2) | 0/18 (0) | 0.78 |
| Current smoking, n (%) | 25/830 (3.0) | 25/812 (3.1) | 0/18 (0) | 0.95 |
| **Drinking, n (%)** | 19/830 (2.3) | 19/812 (2.3) | 0/18 (0) | >0.99 |
| Current drinking, n (%) | 18/830 (2.2) | 18/812 (2.2) | 0/18 (0) | >0.99 |
| **Comorbidity, mean (SD)** | 0.72±0.91(n=830) | 0.70±0.89 (n=812) | 1.50±1.34 (n=18) | **0.02** |
| Any, n (%) | 383/830 (47.3) | 381/812 (46.9) | 12/18 (66.7) | 0.10 |
| Hypertension, n (%) | 258/830 (31.1) | 249/812 (30.7) | 9/18 (50.0) | **0.08** |
| Diabetes, n (%) | 116/830 (14.0) | 111/812 (13.7) | 5/18 (27.8) | **0.09** |
| CVD, n (%) | 92/830 (11.1) | 88/812 (10.8) | 4/18 (22.2) | 0.25 |
| Cancers, n (%) | 31/830 (3.7) | 27/812 (3.3) | 4/18 (22.2) | **<0.001** |
| COPD, n (%) | 45/830 (5.4) | 41/812 (5.0) | 4/18 (22.2) | **0.01** |
| Chronic liver disease, n (%) | 15/830 (1.8) | 15/812 (1.8) | 0/18 (0) | >0.99 |
| Chronic kidney disease, n (%) | 15/830 (1.8) | 14/812 (1.7) | 1/18 (5.6) | 0.76 |
| **Vital signs** |  |  |  |  |
| Body temperature, ℃ | 37.3±2.81 (n=830) | 37.3±2.83 (n=812) | 37.2±1.08 (n=18) | 0.90 |
| >37.3 ℃, n (%) | 430/830 (52.1) | 422/812 (52.2) | 8/18 (50.0) | 0.51 |
| >38.5 ℃, n (%) | 116/830 (14.0) | 116/812 (14.4) | 0/18 (0) | 0.16 |
| Mean arterial pressure, mmHg | 99.5±12.7 (n=830) | 99.6±12.7 (n=812) | 94.8±14.6 (n=18) | 0.11 |
| Heart rate, per minute | 85.5±13.5 (n=830) | 85.5±13.3 (n=812) | 84.9±21.3 (n=18) | 0.91 |
| >100 per minute, n (%) | 113/830 (13.6) | 111/812 (13.7) | 2/18 (11.1) | >0.99 |
| Respiratory rate, per minute | 19.4±1.78 (n=830) | 19.4±1.67 (n=812) | 21.8±3.99 (n=18) | **0.02** |
| >24 per minute, n (%) | 11/830 (1.3) | 8/812 (1.0) | 3/18 (16.7) | **<0.001** |

GI, gastroenterology; SD, standard deviation; CVD, cardiovascular and cerebrovascular disease; COPD, chronic obstructive pulmonary disease;

Supplementary table 6. General, respirational, and GI symptoms between patients with severe and non-severe to severe illness.

|  | **Total (n=830)** | **Non-severe (N=812)** | **Non-severe to severe (N=18)** | **P** |
| --- | --- | --- | --- | --- |
| **General symptoms** |  |  |  |  |
| Myalgia at admission, n (%) | 224/830 (27.0) | 221/812 (27.2) | 3/18 (16.7) | 0.47 |
| Myalgia in total, n (%) | 225/830 (27.1) | 222/812 (27.3) | 3/18 (16.7) | 0.46 |
| Fatigue at admission, n (%) | 389/830 (46.9) | 380/812 (46.8) | 9/18 (50.0) | 0.79 |
| Fatigue in total, n (%) | 403/830 (48.6) | 393/812 (48.4) | 10/18 (55.6) | 0.55 |
| Headache at admission, n (%) | 23/830 (2.8) | 22/812 (2.7) | 1/18 (5.6) | >0.99 |
| Headache in total, n (%) | 24/830 (2.9) | 23/812 (2.8) | 1/18 (5.6) | >0.99 |
| Dizziness at admission, n (%) | 37/830 (4.5) | 37/812 (4.6) | 0/18 (0) | 0.73 |
| Dizziness in total, n (%) | 47/830 (5.7) | 46/812 (5.7) | 1/18 (5.6) | >0.99 |
| Palpitation at admission, n (%) | 35/830 (4.2) | 35/812 (4.3) | 0/18 (0) | 0.76 |
| Palpitation in total, n (%) | 35/830 (4.2) | 35/812 (4.3) | 0/18 (0) | 0.76 |
| Disturbance of consciousness at admission, n (%) | 6/830 (0.7) | 5/812 (0.6) | 1/18 (5.6) | 0.30 |
| Disturbance of consciousness in total, n (%) | 6/830 (0.7) | 5/812 (0.6) | 1/18 (5.6) | 0.30 |
| Others, n (%) | 32/830 (3.9) | 32/812 (3.9) | 0/18 (0) | 0.81 |
| **Respirational symptoms, mean (SD)** | 2.12±1.28 (n=830) | 2.11±1.28 (n=812) | 2.50±1.47 (n=18) | 0.21 |
| Any at admission, n (%) | 732/830 (88.2) | 717/812 (88.3) | 15/18 (83.3) | 0.78 |
| Any in total, n (%) | 751/830 (90.5) | 734/812 (90.4) | 17/18 (94.4) | 0.86 |
| Fever (>37.3℃), n (%) | 430/830 (52.1) | 422/812 (52.2) | 8/18 (50.0) | 0.51 |
| Cough at admission, n (%) | 536/830 (64.6) | 522/812 (64.3) | 14/18 (77.8) | 0.24 |
| Cough in total, n (%) | 570/830 (68.7) | 555/812 (68.3) | 15/18 (83.3) | 0.18 |
| Sputum production at admission, n (%) | 119/830 (14.3) | 116/812 (14.3) | 3/18 (16.7) | >0.99 |
| Sputum production in total, n (%) | 143/830 (17.2) | 139/812 (17.1) | 4/18 (22.2) | 0.80 |
| Hemoptysis at admission, n (%) | 2/830 (0.2) | 2/812 (0.2) | 0/18 (0) | >0.99 |
| Hemoptysis in total, n (%) | 2/830 (0.2) | 2/812 (0.2) | 0/18 (0) | >0.99 |
| Sore throat at admission, n (%) | 42/830 (5.1) | 42/812 (5.2) | 0/18 (0) | 0.66 |
| Sore throat in total, n (%) | 51/830 (6.3) | 51/812 (6.2) | 0/18 (0) | 0.55 |
| Dyspnea/Shortness of breath at admission, n (%) | 251/830 (30.2) | 24/812 (30.0) | 7/18 (38.9) | 0.42 |
| Dyspnea/Shortness of breath in total, n (%) | 281/830 (33.9) | 270/812 (33.3) | 11/18 (61.1) | **0.01** |
| Chest tightness at admission, n (%) | 191/830 (23.0) | 187/812 (23.0) | 4/18 (22.2) | >0.99 |
| Chest tightness in total, n (%) | 265/830 (31.9) | 258/812 (31.8) | 7/18 (38.9) | 0.52 |
| Nasal obstruction at admission, n (%) | 17/830 (2.0) | 17/812 (2.1) | 0/18 (0) | >0.99 |
| Nasal obstruction in total, n (%) | 20/830 (2.4) | 20/812 (2.5) | 0/18 (0) | >0.99 |
| **GI symptoms, mean (SD)** | 1.61±1.69 (n=830) | 1.58±1.68 (n=812) | 2.94±1.80 (n=18) | **0.01** |
| Any at admission, n (%) | 494/830 (59.5) | 478/812 (58.9) | 16/18 (88.9) | **0.01** |
| Any in total, n (%) | 521/830 (62.8) | 503/812 (61.9) | 18/18 (100) | **<0.001** |
| Diarrhea at admission, n (%) | 45/830 (5.4) | 43/812 (5.3) | 2/18 (11.1) | 0.58 |
| Diarrhea in total, n (%) | 71/830 (8.6) | 67/812 (8.3) | 4/18 (22.2) | 0.10 |
| Anorexia at admission, n (%) | 449/830 (54.1) | 434/812 (53.4) | 15/18 (83.3) | **0.01** |
| Anorexia in total, n (%) | 460/830 (55.4) | 445/812 (54.8) | 15/18 (83.3) | 0.02 |
| Nausea at admission, n (%) | 37/830 (4.5) | 34/812 (4.2) | 3/18 (16.7) | **0.05** |
| Nausea in total, n (%) | 44/830 (5.3) | 41/812 (5.0) | 3/18 (16.7) | **0.10** |
| Vomiting at admission, n (%) | 21/830 (2.5) | 19/812 (2.3) | 2/18 (11.1) | 0.11 |
| Vomiting in total, n (%) | 26/830 (3.1) | 24/812 (3.0) | 2/18 (11.1) | 0.20 |
| Acid reflux at admission, n (%) | 8/830 (1.0) | 8/812 (1.0) | 0/18 (0) | >0.99 |
| Acid reflux in total, n (%) | 13/830 (1.6) | 11/812 (1.4) | 2/18 (11.1) | 0.02 |
| Abdominal pain or discomfort at admission, n (%) | 35/830 (4.2) | 35/812 (4.3) | 0/18 (0) | 0.76 |
| Abdominal pain or discomfort in total, n (%) | 54/830 (6.5) | 53/812 (6.5) | 1/18 (5.6) | >0.99 |
| Constipation at admission, n (%) | 12/830 (1.4) | 12/812 (1.5) | 0/18 (0) | >0.99 |
| Constipation in total, n (%) | 23/830 (2.8) | 23/812 (2.8) | 0/18 (0) | >0.99 |
| Gastrointestinal hemorrhage at admission, n (%) | 2/830 (0.2) | 1/812 (0.1) | 1/18 (5.6) | **0.04** |
| Gastrointestinal hemorrhage in total, n (%) | 4/830 (0.5) | 1/812 (0.1) | 3/18 (16.7) | <0.001 |

SD, standard deviation;

**Supplementary Figure legend**

**Supplementary Figure 1.** the flowchart of patients' enrollment
